# Supplementary material for: Controllable synthesis of few-layer ammoniated 1T′-phase WS2 as an anode material for lithium-ion batteries
Source: Royal Society of Chemistry journal article supplement (doi:10.1039/d1nr07542j), 2022-01-01
Supplement: d1nr07542j1.pdf [file d1nr07542j1.pdf]

## Electronic Supplementary Information (ESI)

### Controllable Synthesis of Few-layer Ammoniated 1T'-phase WS<sub>2</sub> as Anode Material for Lithium-ion Batteries

Xiang Li,<sup>a</sup> Zhenzhen Liu,<sup>b</sup> Ding Zhu,<sup>ac</sup> Yigang Yan,<sup>\*ac</sup> Yungui Chen<sup>ac</sup>

<sup>a</sup>Institute of New Energy and Low-Carbon Technology, Sichuan University, Chengdu 610065, China

Email: yigang.yan@scu.edu.cn

<sup>b</sup>College of Materials Science and Engineering, Sichuan University, Chengdu 610065, China

<sup>c</sup>Engineering Research Center of Alternative Energy Materials and Devices, Ministry of Education,

China

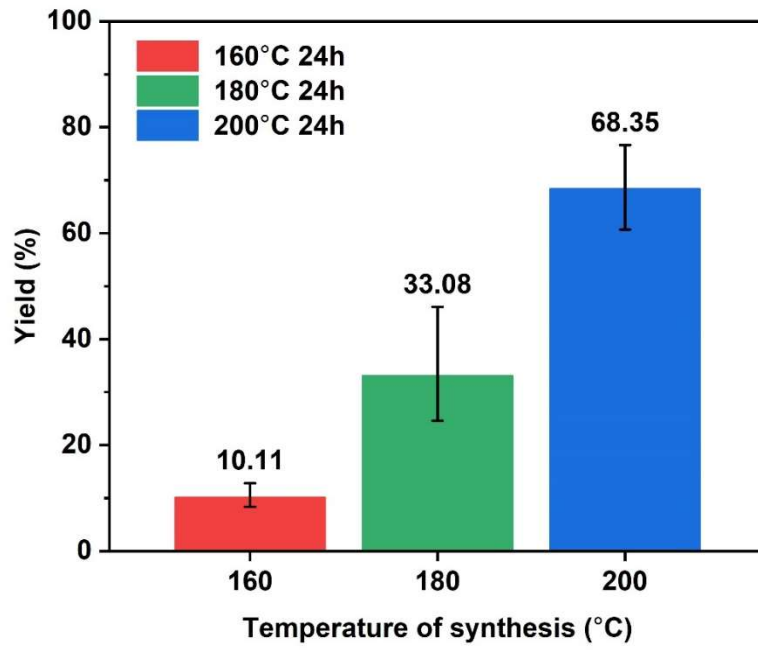

Fig. S1 The yield of as-prepared WS<sub>2</sub> synthesized at different reduction temperatures.

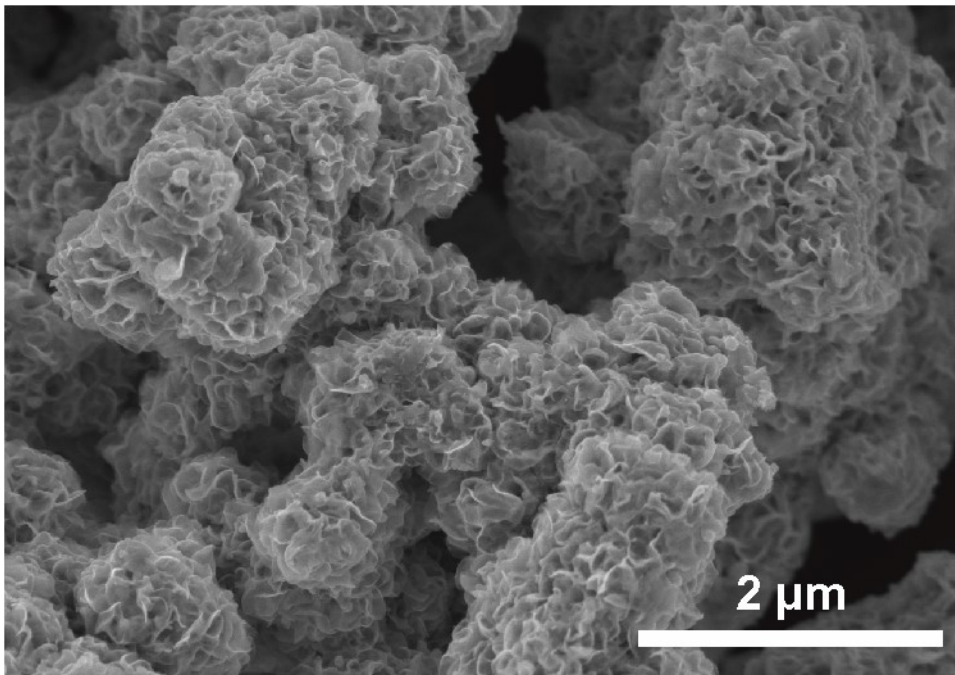

Fig. S2 SEM image of sample 2H-180. The morphology is similar to that of sample 1T'-180 in Fig. 1e.

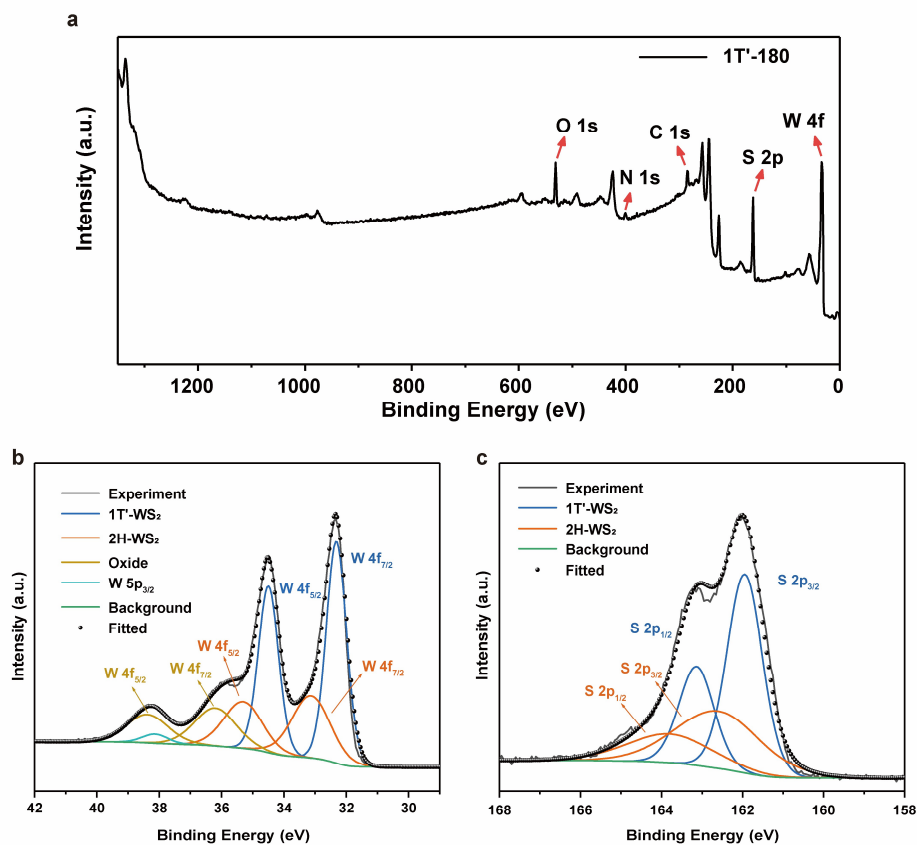

Fig. S3 XPS spectra of 1T'-180: (a) full survey, (b) W 4f and (c) S 2p core level.

Based on the full survey in Fig. S3a, the atomic concentrations for S, O, W, C and N elements are 40.06%, 17.18%, 18.12%, 18.94% and 5.70%, respectively. The C signal in 1T'-180 is attributed to the carbon contamination during the XPS test. The O signal probably originates from surface oxidation of nanostructure WS<sub>2</sub> or absorbed water from air during the sample transfer process. W 4f and S 2p core level peaks are deconvoluted to distinguish the 2H and 1T' phase of WS<sub>2</sub>.<sup>1</sup> As shown in Fig. S3b, the spectrum of W 4f core level can be deconvoluted into four components, three W 4f<sub>7/2</sub> and W 4f<sub>5/2</sub> doublets with the intensity ratio of 4:3 and a gap of 2.18 eV, and one W 5p<sub>3/2</sub> peak located at a binding energy of 38.21 eV.<sup>2</sup> The W 4f doublet for 1T'-phase WS<sub>2</sub> locates at 32.33 and 34.51 eV (blue curves). The W 4f doublet for 2H-phase WS<sub>2</sub> locates at 33.19 and 35.37 eV (orange curves), which is also observed in sample 2H-180 (Fig. S4a). The W 4f doublet locating at 36.27 and 38.45 eV (yellow curves) is assigned to the oxide state of W. The doublet of 1T'-phase exhibits a shift of ~0.86 eV towards lower binding energy, compared with 2H-phase WS<sub>2</sub>.<sup>3</sup> The spectrum of S 2p core level can also be deconvoluted into two doublets, see Fig. S3c. The S 2p doublet is composed of the S 2p<sub>3/2</sub> and the S 2p<sub>1/2</sub> peaks with an intensity ratio of 2:1 and a gap of 1.19 eV.<sup>2</sup> The doublet for 1T'-WS<sub>2</sub> locates at 161.95 and 163.14 eV (blue curves) and the one for 2H-phase locates at 162.60 and 163.79 eV (orange curves). The XPS deconvolutions of W 4f and S 2p peaks indicate that the atom ratio of W:S is ~ 1:2 and concentration of 1T' phase is ~59% for sample 1T'-180. The phase concentration of 1T' and 2H is shown in Table S1.

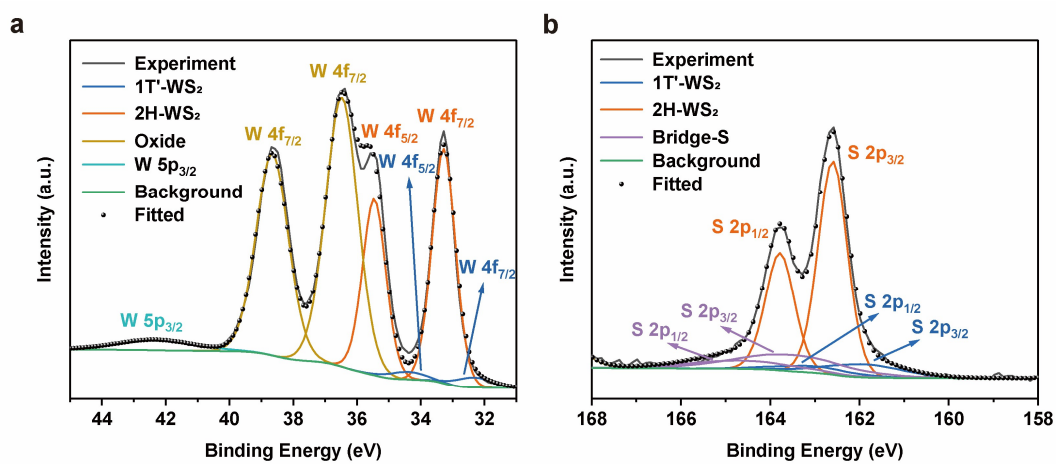

Fig. S4 XPS spectra of sample 2H-180: (a) W 4f, (b) S 2p.

Table. S1 The concentration of 1T'-phase and 2H-phase in different 1T'-WS<sub>2</sub> samples based on the S 2p XPS spectra in Fig. S3 and S5.

| Sample  | Concentration (%) |          | Layer numbers |
|---------|-------------------|----------|---------------|
|         | 1T'-phase         | 2H-phase |               |
| 1T'-160 | 62.8              | 37.2     | 4 ~ 6         |
| 1T'-180 | 58.9              | 41.1     | 9 ~ 10        |
| 1T'-200 | 55.3              | 44.7     | ~ 20          |

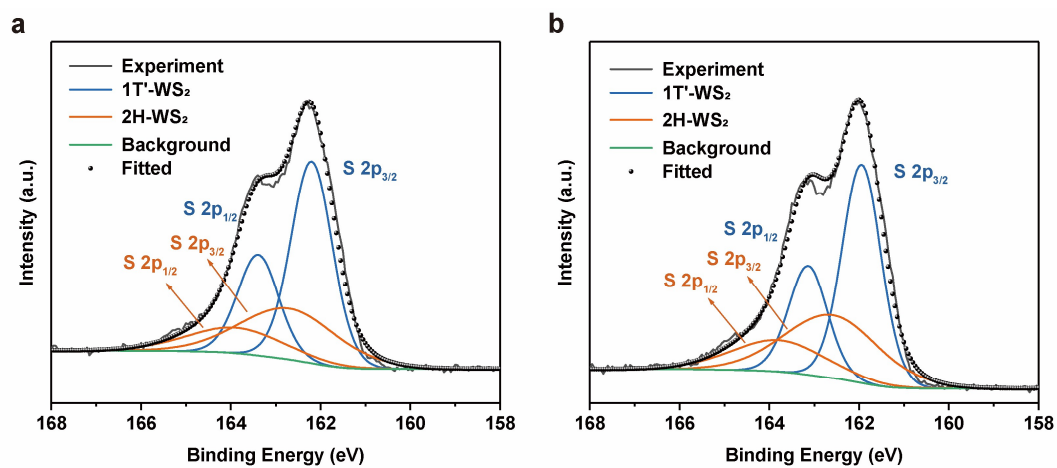

Fig. S5 S 2p XPS spectra of sample (a) 1T'-160 and (b) 1T'-200.

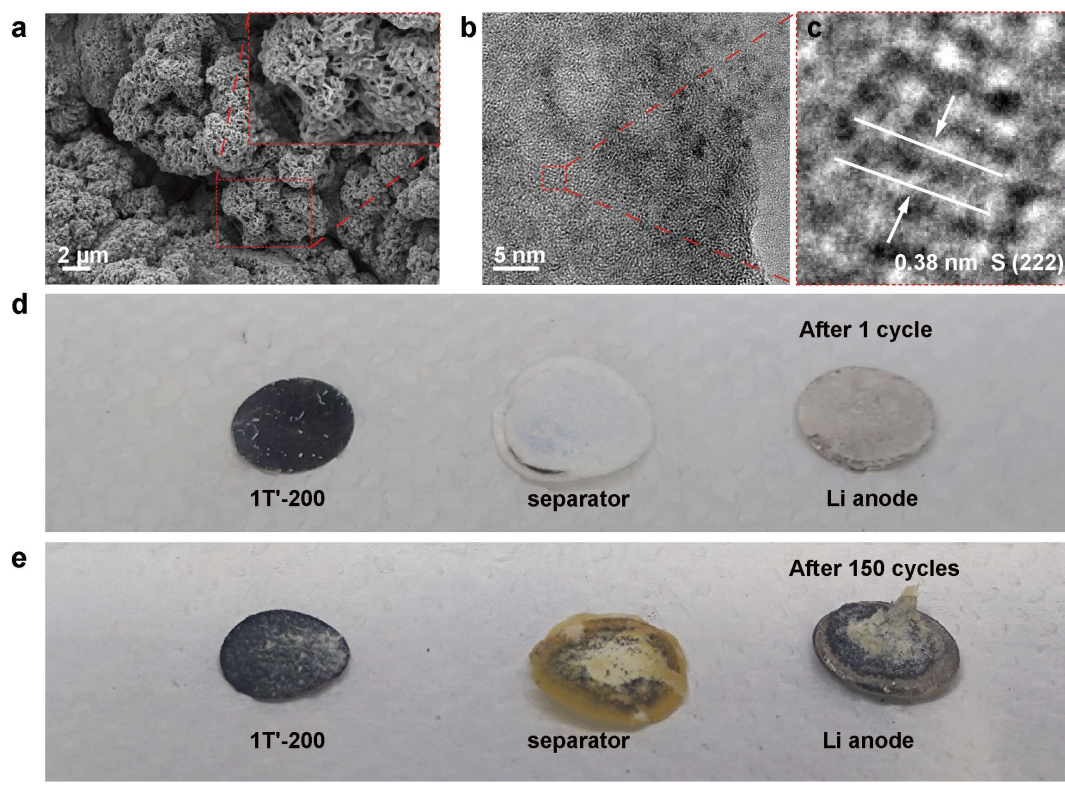

Fig. S6 (a) SEM and (b,c) TEM images of 1T'-200 after 150 cycles at full charge state. (d, e) Photographs of the disassembled batteries of 1T'-200 after different cycles.

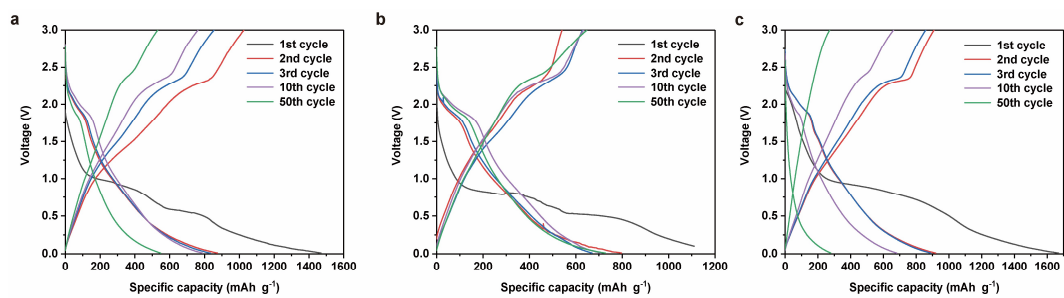

Fig. S7 Galvanometric charge/discharge curves of the (a) 1T'-160 electrode, (b) 1T'-200 electrode and (c) 2H-180 electrode.



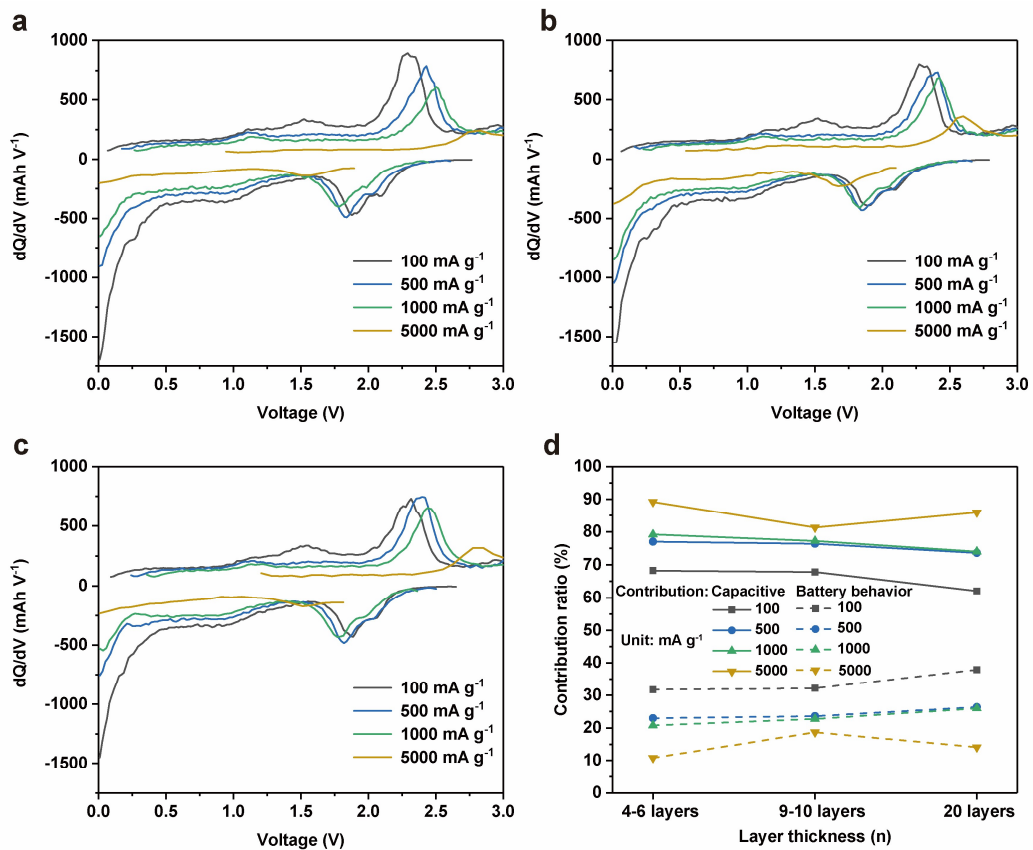

Fig. S8 Differential capacity  $dQ/dV$  curves of the (a) 1T'-160 electrode, (b) 1T'-180 electrode, (c) 1T'-200 electrode and (d) corresponding surface controlled and battery behavior controlled contributions.

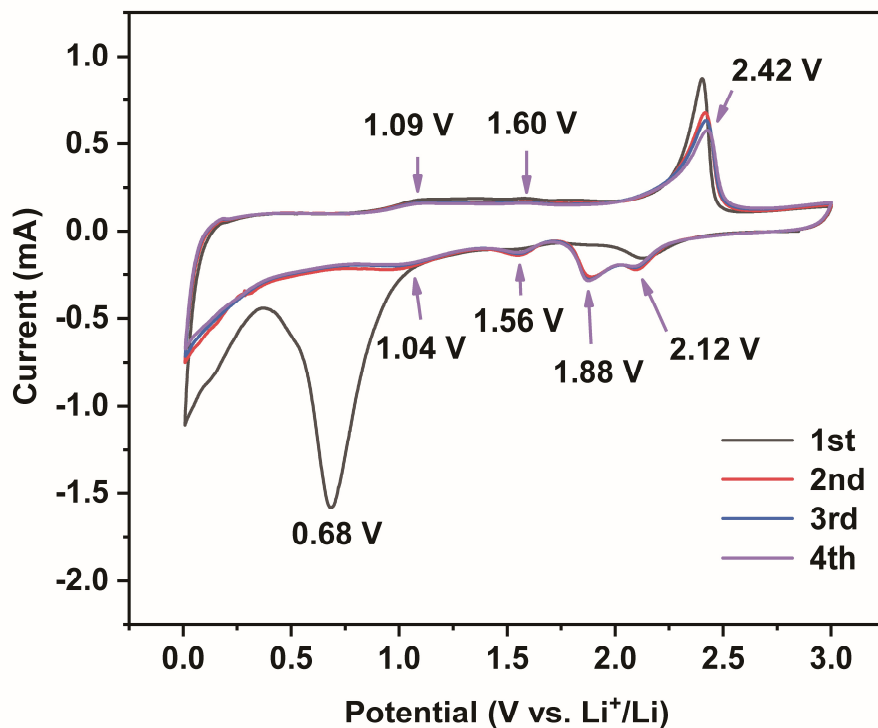

Fig. S9 Cyclic voltammograms of 2H-180 electrode over a potential window of 0.01-3.0 V (vs. Li<sup>+</sup>/Li) at a scan rate of 0.1 mV s<sup>-1</sup>.

## References

- 1 A. Anto Jeffery, C. Nethravathi and M. Rajamathi, *The Journal of Physical Chemistry C*, 2013, **118**, 1386-1396.
- 2 D. Pierucci, J. Zribi, C. Livache, C. Gréboval, M. G. Silly, J. Chaste, G. Patriarche, D. Montarnal, E. Lhuillier, A. Ouerghi and B. Mahler, *Appl. Phys. Lett.*, 2019, **115**, 32102.
- 3 Z. Lai, Q. He, T. H. Tran, D. V. M. Repaka, D. Zhou, Y. Sun, S. Xi, Y. Li, A. Chaturvedi, C. Tan, B. Chen, G. Nam, B. Li, C. Ling, W. Zhai, Z. Shi, D. Hu, V. Sharma, Z. Hu, Y. Chen, Z. Zhang, Y. Yu, X. Renshaw Wang, R. V. Ramanujan, Y. Ma, K. Hippalgaonkar and H. Zhang, *Nat. Mater.*, 2021, **20**, 1113-1120.
